# Supplementary material for: Inbreeding in Chinese Fir: Insight into the Rare Self-Fertilizing Event from a Genetic View
Source: MDPI journal article supplement (doi:10.3390/genes13112105), 2022-11-13
Supplement: s1 [file s1]

**Table S1.** Attributes of 20 microsatellite loci in this study.

| Locus | Primer sequence (5'-3')    | Repeat motif | GenBank accession<br>No | Product size range<br>(bp) | Allele number    |                  |
|-------|----------------------------|--------------|-------------------------|----------------------------|------------------|------------------|
|       |                            |              |                         |                            | Open-pollination | Self-pollination |
| SSR1  | F:CAATCAGCCAAGTTGTACAGGC   | (AT)8(AG)18  | AB757708                | 332-362                    | 14               | 2                |
|       | R:CATACCTTAGCAAAGCCCTCAGC  |              | AB757709                |                            |                  |                  |
| SSR2  | F:TGAAATTGCGTTGTACCGAAGG   | (GA)13       | AB749554                | 261-289                    | 12               | 2                |
|       | R:TAACGAGACGAGCGACAATCTCC  |              | AB749555                |                            |                  |                  |
| SSR3  | F:GATCCTCTGGTACTTGGTGCCC   | (AT)9        | AB749556                | 163-179                    | 5                | 1                |
|       | R:TGCAAAGTCATGTCATCTCTGGC  |              | AB749557                |                            |                  |                  |
| SSR4  | F:TGAATGGACTGCCACAAATTCC   | (AG)11       | AB749550                | 277-299                    | 7                | 1                |
|       | R:TTCTTTGCAGGAAAGCCAACAAG  |              | AB749551                |                            |                  |                  |
| SSR5  | F:CTTAAGATAGCAGCGGGAATGG   | (CT)11       | AB749562                | 246-264                    | 8                | 2                |
|       | R:CTTGCTCGATTTCTTGCATCTGG  |              | AB749563                |                            |                  |                  |
| SSR7  | F:AAGAGAAGAGGAGGAGGTCCAAG  | (AG)9        | AB749570                | 258-270                    | 5                | 2                |
|       | R:CAGGAGCAGGTGCAGTAGCATTC  |              | AB749571                |                            |                  |                  |
| SSR8  | F:ATTATCCGAGGCAGATACGCAC   | (GGA)10      | AB749572                | 332-341                    | 4                | 1                |
|       | R:CTTCTCCGTATTTGATCCATCGC  |              | AB749573                |                            |                  |                  |
| SSR9  | F:GAGCCGTGAAGAACGAAGGTCTC  | (GAA)12      | AB749574                | 249-267                    | 6                | 2                |
|       | R:ACGATCGGATTGTCTCAGAAACG  |              | AB749575                |                            |                  |                  |
| SSR10 | F:TGATCTTGGCATGTCAGTCTGG   | (AT)9        | AB749576                | 121-145                    | 7                | 1                |
|       | R:TGTCTGTCTGCCTGCAGTTATGC  |              | AB749577                |                            |                  |                  |
| SSR11 | F:TCATCAGCCTCAGTTTGTACTTGC | (AT)9        | AB749584                | 335-375                    | 14               | 2                |
|       | R: GCAATCATGGGCTCTCTGCAC   |              | AB749585                |                            |                  |                  |
| SSR12 | F:AATGCGACTTGCAAATTTCTGG   | (AGA)10      | AB749582                | 225-246                    | 5                | 1                |
|       | R:CGAATTCCTCAATCACTTGGCTG  |              | AB749583                |                            |                  |                  |
| SSR13 | F:GCGGCCATTTATATCATCTTC    | (GAA)9       | AB749588                | 106-115                    | 4                | 2                |

|       |                           |         |          |         |     |     |
|-------|---------------------------|---------|----------|---------|-----|-----|
|       | R:CACGCCTGTAATTCATCTCCGTC |         | AB749589 |         |     |     |
|       | F:GGTACTGCGAATCTTCAAATCC  |         | AB749580 |         |     |     |
| SSR14 | R:TGTTCAAGAAAGGAAGCAAACGG | (TC)9   | AB749581 | 266-292 | 7   | 1   |
|       | F:TTTGGGACCTTATGGAGGTGGAG |         | AB749602 |         |     |     |
| SSR15 | R:AAACCACCAGGTTGAGAAGCAGC | (GGA)9  | AB749603 | 123-144 | 5   | 2   |
|       | F:TTTCGGCTCTCCGACTCCTTAAC |         | AB749594 |         |     |     |
| SSR16 | R:AGAATCGCGTCCAGAACACAGAG | (CT)11  | AB749595 | 118-132 | 5   | 2   |
|       | F:TCCAGGAGTCTGTGAATCCGAAG |         | AB749600 |         |     |     |
| SSR17 | R:CAGTACCAATTCAACCCAGCAGC | (CTG)9  | AB749601 | 216-222 | 3   | 2   |
|       | F:TCAAGAAGTTCCGCCATTGAGAG |         | AB749590 |         |     |     |
| SSR18 | R:CCCATGAGGATTCAGAAACATGC | (CTT)10 | AB749591 | 337-349 | 5   | 2   |
|       | F:TTAATGGTGCAAGGTGGAATTGG |         | AB749592 |         |     |     |
| SSR19 | R:TTGAATCCCACTGATCACACTGC | (GAA)10 | AB749593 | 264-270 | 3   | 1   |
|       | F:CTGTTTGTACATTGGCCTCGAC  |         | AB749596 |         |     |     |
| SSR20 | R:TCACAAACCACTGTGCTGGAATG | (CTC)9  | AB749597 | 120-129 | 3   | 2   |
|       | F:GTTGGGATGTCATCAAGATTGG  |         | AB749598 |         |     |     |
| SSR21 | R:TGAAAGAGGCGGAAATTGGTAGG | (TC)11  | AB749599 | 208-256 | 10  | 2   |
| Total |                           |         |          |         | 132 | 33  |
| Mean  |                           |         |          |         | 6.6 | 1.7 |

F indicates forward primer; R indicates reverse primer.
