# Supplementary material for: Inbreeding in Chinese Fir: Insight into the Rare Self-Fertilizing Event from a Genetic View
Source: MDPI journal article supplement (doi:10.3390/genes13112105), 2022-11-13
Supplement: s1 [file s1]

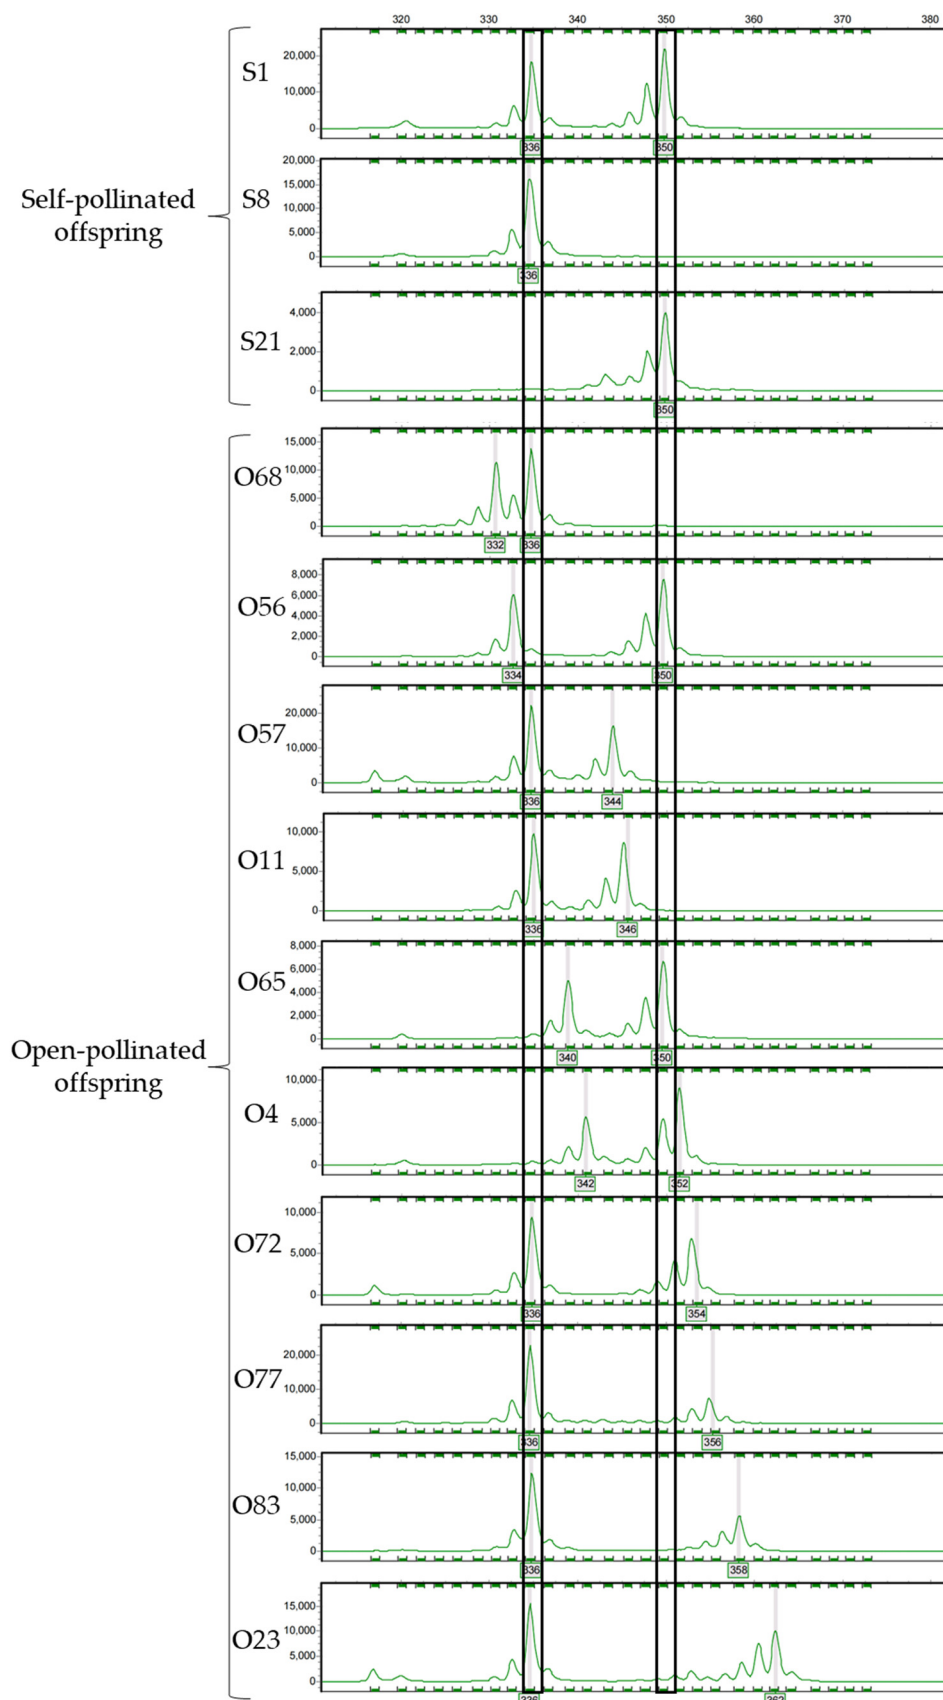

**Figure S1.** The fingerprint profiles of self- and open-offspring generated by primer SSR1. The fluorescence strength was shown in the Y-axis and DNA fragment sizes in base pairs was shown in the X-axis. The allele detected both in self- and open-pollinated offspring was represented by black box.
