# Supplementary material for: Inbreeding in Chinese Fir: Insight into the Rare Self-Fertilizing Event from a Genetic View
Source: Genes (Basel). 2022 Nov 13;13(11):2105. doi: 10.3390/genes13112105 (PMC9690749; doi:10.3390/genes13112105)
Supplement: Supplementary file 1 [file genes-13-02105-s001.zip › Table S2.xlsx]

## Sheet: Sheet1
Table S2: Microsatellite profiles for 20 SSR loci for 400 offspring.
Sample	Population	SSR1		SSR2		SSR3		SSR4		SSR5		SSR7		SSR8		SSR9		SSR10		SSR11		SSR12		SSR13		SSR14		SSR15		SSR16		SSR17		SSR18		SSR19		SSR20		SSR21
O1	Open-pollination	336	350	269	277	173	173	277	277	250	254	258	270	335	335	255	255	131	131	337	345	237	237	109	109	276	276	138	138	126	126	216	219	337	343	267	267	129	129	208	208
O2	Open-pollination	336	336	277	279	173	175	277	281	254	260	258	270	335	338	255	255	129	131	345	359	237	237	115	115	276	278	135	138	126	126	216	219	337	343	264	267	126	129	244	256
O3	Open-pollination	350	354	269	277	173	175	277	281	250	260	258	270	335	335	255	255	129	131	337	359	237	237	115	115	276	278	123	138	118	126	216	219	343	343	267	267	126	129	208	208
O4	Open-pollination	342	352	277	277	173	173	277	281	254	256	258	270	335	335	255	264	129	131	337	341	237	237	109	115	276	276	138	138	120	126	216	219	343	349	267	267	126	129	208	242
O5	Open-pollination	336	362	265	277	173	175	279	281	250	256	258	270	332	335	255	264	129	131	337	349	237	237	109	115	276	278	135	138	126	126	216	216	343	346	267	267	126	129	238	246
O6	Open-pollination	336	336	269	269	173	175	277	277	254	260	270	270	335	335	255	255	129	131	345	355	237	237	109	115	276	276	135	138	126	126	216	219	343	343	267	267	129	129	208	208
O7	Open-pollination	336	338	277	277	173	173	277	277	254	256	270	270	332	335	255	258	131	133	345	349	237	246	109	109	276	276	138	138	126	128	216	219	337	343	267	270	126	129	242	244
O8	Open-pollination	336	344	277	279	173	173	277	277	254	256	258	258	335	335	255	255	131	133	337	337	237	237	112	115	276	278	123	138	126	126	219	219	337	343	267	270	126	129	208	242
O9	Open-pollination	336	352	269	277	173	173	277	277	250	254	258	270	335	335	255	255	131	131	337	345	237	237	115	115	276	276	135	138	126	126	216	219	337	337	267	267	129	129	244	244
O10	Open-pollination	350	350	269	277	173	173	277	277	254	254	258	270	332	335	255	255	131	131	335	337	237	237	115	115	276	276	135	138	126	126	216	219	337	343	267	267	129	129	244	250
O11	Open-pollination	336	346	265	269	173	175	277	281	248	254	270	270	335	338	255	264	129	131	337	341	237	237	109	115	276	278	138	138	126	126	216	219	337	343	267	267	126	129	244	246
O12	Open-pollination	342	342	277	277	175	175	281	281	248	250	258	258	332	332	264	264	133	133	337	337	237	237	109	109	276	276	138	138	126	128	216	219	343	343	267	267	126	126	238	238
O13	Open-pollination	336	350	269	277	173	173	277	277	250	250	258	270	335	335	255	255	131	131	337	345	237	237	109	115	276	276	135	135	126	126	216	219	337	343	267	267	129	129	208	208
O14	Open-pollination	352	356	275	277	173	175	277	279	248	250	258	268	335	335	255	264	129	131	337	337	237	237	115	115	276	278	135	138	126	126	216	216	337	349	267	267	126	129	244	250
O15	Open-pollination	350	354	277	279	173	173	277	277	250	254	260	270	335	335	255	258	131	133	337	355	237	237	112	115	276	278	138	141	126	126	216	219	337	337	267	270	126	129	244	246
O16	Open-pollination	336	350	269	277	173	173	277	277	250	254	258	270	335	335	255	255	131	131	337	345	237	237	109	109	276	276	135	138	126	126	219	219	337	343	267	267	129	129	208	244
O17	Open-pollination	342	354	277	279	173	175	277	281	248	260	260	270	335	335	255	261	129	133	337	355	237	237	109	115	276	276	138	138	126	128	216	216	343	343	264	264	126	129	208	208
O18	Open-pollination	336	352	269	269	173	173	277	277	250	254	258	258	335	335	255	255	131	131	345	345	237	237	109	115	276	276	135	138	126	126	216	216	337	343	267	267	129	129	208	244
O19	Open-pollination	336	336	269	269	173	173	277	277	250	254	258	270	335	335	255	255	131	131	337	337	237	237	109	115	276	276	135	138	126	126	216	219	337	343	267	267	129	129	208	244
O20	Open-pollination	350	354	269	269	173	173	277	277	250	254	258	258	335	335	255	258	131	131	337	345	237	237	115	115	276	278	123	135	126	126	216	216	337	343	264	267	126	129	244	246
O21	Open-pollination	336	342	267	269	173	173	277	281	254	256	258	270	335	335	255	255	129	131	341	345	237	237	109	115	276	276	123	138	118	126	216	216	337	349	264	267	126	129	242	244
O22	Open-pollination	354	362	277	279	173	175	277	285	248	256	260	270	335	335	261	264	129	133	337	343	225	237	109	115	276	278	138	138	126	132	216	216	337	337	264	267	126	129	208	242
O23	Open-pollination	336	362	277	277	173	175	277	281	248	254	258	258	332	335	255	264	131	133	337	345	237	237	109	109	276	276	135	138	126	128	216	219	337	337	264	267	126	129	238	244
O24	Open-pollination	336	352	269	269	173	173	277	277	250	254	258	270	335	335	255	255	131	131	337	345	237	237	109	115	276	276	135	138	126	126	216	219	337	337	267	267	129	129	208	244
O25	Open-pollination	342	344	277	279	173	175	277	277	250	256	260	270	332	335	255	264	129	133	343	355	237	237	109	115	276	278	138	141	126	128	219	219	337	337	264	267	126	126	238	246
O26	Open-pollination	344	350	269	269	173	173	277	277	254	256	258	258	335	335	255	255	131	131	337	337	237	237	115	115	276	278	135	141	126	126	216	216	337	337	267	270	126	129	242	244
O27	Open-pollination	336	362	277	279	173	173	277	281	250	260	258	270	332	338	255	261	129	133	337	355	225	237	109	115	276	276	138	138	126	126	216	219	337	343	264	267	126	129	238	256
O28	Open-pollination	336	350	269	277	173	173	277	277	250	250	258	270	335	335	255	255	131	133	337	345	237	237	109	115	276	276	135	138	126	126	216	219	337	343	267	267	129	129	208	244
O29	Open-pollination	336	350	269	277	173	173	277	277	250	254	270	270	335	335	255	255	131	131	345	345	237	237	109	115	276	276	135	138	126	126	219	219	343	343	267	267	129	129	208	208
O30	Open-pollination	344	350	269	269	173	179	277	281	250	256	258	270	335	335	255	255	129	131	337	341	237	237	109	109	276	276	138	138	120	126	216	216	337	349	264	267	126	129	242	244
O31	Open-pollination	336	350	277	279	173	173	277	281	250	250	270	270	332	335	255	258	129	131	337	345	237	237	109	115	276	278	135	138	126	126	216	219	343	343	264	267	126	129	208	244
O32	Open-pollination	336	344	267	277	173	179	277	279	254	256	258	258	335	335	255	255	129	131	337	349	237	237	109	115	276	276	123	135	118	126	216	219	343	349	264	267	126	129	208	244
O33	Open-pollination	336	336	277	279	173	173	277	277	250	254	270	270	335	338	255	255	129	131	337	355	237	237	109	115	276	276	138	138	126	126	216	219	343	343	264	267	129	129	208	256
O34	Open-pollination	336	344	269	269	173	173	277	281	254	256	270	270	335	335	255	264	129	131	337	341	237	237	109	109	276	278	138	138	120	126	216	219	343	343	264	267	126	129	208	244
O35	Open-pollination	332	350	269	271	173	173	277	279	248	254	270	270	335	338	255	258	129	131	345	345	234	237	115	115	276	278	123	135	126	126	216	219	337	349	264	267	126	129	244	256
O36	Open-pollination	332	336	271	277	173	173	277	279	254	260	270	270	335	335	255	255	129	131	345	345	237	237	109	109	278	278	123	138	126	126	216	219	337	343	267	267	126	129	244	250
O37	Open-pollination	336	356	261	269	173	173	277	277	254	256	270	270	335	335	255	261	129	131	343	345	237	237	109	115	276	276	138	138	126	128	216	216	337	343	267	267	126	129	208	252
O38	Open-pollination	336	350	269	275	173	173	277	277	250	254	270	270	335	335	255	255	131	131	335	337	237	237	109	115	276	276	135	138	126	126	216	216	337	343	267	267	126	129	244	252
O39	Open-pollination	350	358	265	269	173	173	277	279	250	256	258	268	335	335	255	255	131	133	345	349	237	237	109	115	266	276	135	138	126	126	216	216	337	343	267	267	126	129	244	250
O40	Open-pollination	342	350	267	269	173	173	277	279	254	256	258	270	335	335	255	264	129	131	345	349	237	237	115	115	276	278	135	138	120	126	216	219	337	349	267	267	126	129	242	244
O41	Open-pollination	336	356	269	279	173	177	277	287	246	250	258	258	335	341	255	255	129	131	337	351	237	240	109	115	276	276	138	138	126	126	216	216	337	340	267	267	129	129	244	246
O42	Open-pollination	336	350	273	277	173	173	277	279	254	256	258	270	335	335	255	264	131	133	337	349	237	237	109	115	266	276	135	138	126	126	216	219	343	343	267	267	129	129	208	208
O43	Open-pollination	336	342	277	277	173	173	277	279	250	256	258	258	335	335	255	264	129	131	337	349	237	237	109	115	276	276	123	135	118	126	216	216	337	349	267	267	126	129	242	244
O44	Open-pollination	346	350	275	277	173	175	277	281	254	256	270	270	335	338	255	264	129	131	337	345	237	237	109	115	276	278	135	138	126	126	216	219	343	343	267	267	126	129	208	246
O45	Open-pollination	336	350	269	273	173	173	277	279	250	256	258	268	335	335	255	255	131	133	337	349	237	237	109	109	266	276	135	138	126	126	216	219	337	343	267	267	129	129	244	250
O46	Open-pollination	336	358	265	277	173	173	277	281	250	256	258	268	335	335	255	255	129	131	337	359	237	237	109	115	266	276	135	135	126	126	216	216	337	343	267	267	129	129	244	250
O47	Open-pollination	344	350	277	277	173	179	277	279	250	256	258	270	335	335	255	255	129	131	345	349	237	237	109	115	276	278	138	138	120	126	216	216	343	343	264	267	126	129	208	244
O48	Open-pollination	336	358	269	269	173	175	277	277	250	254	270	270	335	335	255	258	129	131	337	345	237	237	109	115	276	276	138	138	118	126	216	216	337	343	264	267	129	129	244	248
O49	Open-pollination	336	346	265	269	173	175	277	279	248	250	270	270	335	338	255	264	129	131	337	337	237	237	115	115	276	278	138	138	126	128	216	216	337	343	267	267	126	129	244	246
O50	Open-pollination	344	350	269	269	173	179	277	281	254	256	258	270	335	335	255	264	129	131	341	345	237	237	109	109	276	278	138	138	120	126	216	216	337	343	264	267	126	129	244	244
O51	Open-pollination	350	350	269	269	173	173	277	281	254	256	270	270	335	335	255	264	129	131	337	341	237	237	109	109	276	276	138	138	120	126	216	216	337	343	267	267	126	129	242	244
O52	Open-pollination	336	350	273	277	173	173	277	279	254	256	270	270	335	335	255	264	131	133	337	349	237	237	109	115	266	276	135	138	126	126	216	219	343	343	267	267	129	129	208	244
O53	Open-pollination	350	350	265	269	173	173	277	279	254	256	258	270	335	335	255	264	129	131	345	349	237	237	109	115	266	276	135	138	126	126	216	216	337	343	267	267	129	129	208	250
O54	Open-pollination	350	358	269	273	173	173	277	279	254	256	268	270	335	335	255	255	129	131	345	349	237	237	115	115	276	276	135	138	126	126	216	216	343	343	267	267	126	129	244	250
O55	Open-pollination	336	350	273	277	173	173	277	279	254	256	270	270	335	335	255	264	131	133	337	349	237	237	109	115	266	276	135	138	126	126	216	219	337	343	267	267	129	129	208	244
O56	Open-pollination	334	350	269	269	173	173	277	279	250	260	258	270	335	338	255	264	131	131	345	355	237	237	109	115	276	276	138	141	126	126	216	216	343	343	264	267	126	129	208	230
O57	Open-pollination	336	344	267	277	173	173	277	279	250	256	270	270	335	335	255	264	129	131	345	349	237	237	115	115	276	278	123	138	118	126	216	219	343	343	264	267	126	129	208	244
O58	Open-pollination	344	350	267	269	173	173	277	281	250	256	258	270	335	335	255	255	129	131	337	341	237	237	109	109	276	278	123	135	118	126	216	216	343	343	267	267	126	129	208	244
O59	Open-pollination	342	350	277	277	173	179	277	279	250	256	258	270	335	335	255	255	129	131	345	349	237	237	109	115	276	278	135	138	120	126	216	216	337	349	267	267	126	129	242	244
O60	Open-pollination	342	350	267	269	173	179	277	279	250	256	258	258	335	335	255	264	129	131	337	349	237	237	109	115	276	278	123	135	118	126	216	219	343	349	267	267	126	129	208	242
O61	Open-pollination	336	350	265	269	173	173	277	281	250	256	258	270	335	335	255	255	129	131	345	359	237	237	115	115	266	276	135	138	126	126	216	216	343	343	267	267	129	129	208	250
O62	Open-pollination	342	350	267	269	173	173	277	281	254	256	270	270	335	335	255	255	129	131	337	341	237	237	115	115	276	278	135	138	120	126	216	219	337	349	264	267	126	129	244	244
O63	Open-pollination	336	344	269	279	173	173	277	277	254	256	260	270	335	335	255	255	131	131	337	337	237	237	112	115	276	278	123	135	126	126	216	219	337	343	264	267	126	129	208	246
O64	Open-pollination	344	350	277	285	173	173	277	277	250	256	258	270	335	335	255	258	129	131	345	349	237	237	109	115	276	276	135	141	126	126	216	216	337	349	267	267	129	129	244	244
O65	Open-pollination	340	350	265	269	173	173	277	277	254	256	258	268	335	335	255	255	129	131	337	345	237	237	109	115	276	276	138	138	126	126	216	219	343	349	267	267	129	129	208	208
O66	Open-pollination	332	336	269	277	173	173	277	281	248	250	260	270	335	335	255	258	129	131	337	359	237	237	115	115	276	278	123	135	126	126	216	219	337	343	267	267	126	129	244	250
O67	Open-pollination	336	350	265	269	173	173	277	279	254	256	270	270	335	335	255	264	129	131	345	349	237	237	115	115	266	276	138	138	126	126	216	216	343	343	267	267	129	129	244	250
O68	Open-pollination	332	336	269	271	173	173	277	281	248	254	258	270	335	335	255	255	131	135	345	359	234	237	115	115	276	278	138	138	126	126	216	216	337	349	264	267	126	129	208	250
O69	Open-pollination	336	358	269	277	173	173	277	281	254	256	258	258	335	335	255	255	131	131	337	353	237	237	115	115	276	276	138	138	126	128	216	216	337	343	267	267	129	129	242	244
O70	Open-pollination	350	350	267	269	173	173	277	279	254	254	270	270	335	338	255	255	131	131	337	345	237	237	109	109	276	278	138	141	126	126	216	216	337	337	267	267	126	129	244	252
O71	Open-pollination	336	342	269	269	173	173	277	279	250	256	270	270	335	335	255	264	129	131	337	349	237	237	109	115	276	276	123	138	118	126	216	216	337	343	264	267	126	129	244	244
O72	Open-pollination	336	354	269	279	173	173	277	277	250	256	258	270	335	335	255	255	131	131	337	355	237	237	112	115	276	278	135	141	126	126	219	219	337	337	267	270	126	129	242	244
O73	Open-pollination	350	350	269	273	173	173	277	279	250	256	258	270	335	335	255	255	131	133	345	349	237	237	109	115	266	276	138	138	126	126	216	216	337	343	267	267	129	129	244	250
O74	Open-pollination	350	356	269	279	173	173	277	277	248	250	258	268	335	335	255	261	129	131	337	343	237	237	109	109	276	282	135	138	126	126	216	219	343	346	267	267	126	129	208	250
O75	Open-pollination	344	350	269	269	173	179	277	281	254	256	270	270	335	335	255	255	129	131	341	345	237	237	109	115	276	276	123	135	118	126	216	216	337	349	267	267	126	129	242	244
O76	Open-pollination	336	346	269	269	173	173	277	281	254	260	258	270	335	338	255	258	129	131	337	359	237	237	109	115	276	290	138	138	126	126	216	216	337	349	264	267	126	129	208	256
O77	Open-pollination	336	356	265	277	173	175	277	281	248	250	258	268	335	335	255	258	129	131	337	341	237	237	115	115	276	278	135	138	126	128	216	219	337	349	267	267	126	129	208	250
O78	Open-pollination	332	336	269	269	173	173	277	279	248	254	258	258	335	335	255	258	129	131	337	337	237	237	109	109	276	290	123	138	126	126	216	219	343	343	267	267	126	129	208	250
O79	Open-pollination	350	350	277	279	173	173	277	277	254	256	258	270	335	335	255	255	131	131	337	345	237	237	109	112	276	278	123	138	126	126	216	219	337	337	264	267	126	129	244	246
O80	Open-pollination	336	354	269	269	173	173	277	277	250	260	270	270	335	335	255	255	129	131	337	355	237	237	109	115	276	278	135	138	126	126	216	216	337	343	267	267	126	129	208	244
O81	Open-pollination	342	350	269	269	173	179	277	279	254	256	258	270	335	335	255	255	129	131	337	349	237	237	115	115	276	276	135	138	120	126	216	216	337	349	264	267	126	129	242	244
O82	Open-pollination	336	342	267	269	173	179	277	281	250	256	270	270	335	335	255	255	129	131	341	345	237	237	109	115	276	276	135	138	120	126	216	216	343	343	267	267	126	129	242	244
O83	Open-pollination	336	358	265	269	173	173	277	281	254	256	258	270	335	335	255	255	129	131	345	359	237	237	109	109	266	276	135	138	126	126	216	219	337	343	267	267	126	129	244	250
O84	Open-pollination	336	350	277	277	173	175	277	277	254	256	260	270	335	335	255	258	129	131	337	345	237	237	115	115	276	276	135	138	126	126	216	219	343	343	267	267	129	129	208	244
O85	Open-pollination	344	350	277	277	173	173	277	279	254	256	270	270	335	335	255	255	129	131	337	349	237	237	109	115	276	276	123	138	118	126	216	219	337	349	267	267	126	129	208	242
O86	Open-pollination	336	342	267	277	173	173	277	279	254	256	258	270	335	335	255	255	129	131	345	349	237	237	109	115	276	276	123	138	118	126	216	216	343	343	264	267	126	129	208	244
O87	Open-pollination	350	350	269	279	173	175	277	281	250	260	258	270	335	338	255	255	129	131	337	359	237	237	109	115	276	278	123	138	118	126	216	216	337	343	264	267	126	129	244	256
O88	Open-pollination	350	358	269	273	173	173	277	281	250	256	258	268	335	335	255	255	129	131	337	359	237	237	109	109	276	276	138	138	126	126	216	219	337	343	267	267	126	129	208	244
O89	Open-pollination	342	350	267	277	173	173	277	279	254	256	258	258	335	335	255	264	129	131	345	349	237	237	115	115	276	278	135	138	120	126	216	216	337	349	267	267	126	129	242	244
O90	Open-pollination	336	356	275	277	173	175	277	279	250	256	270	270	335	335	255	258	129	131	337	337	237	237	115	115	276	278	138	138	126	128	216	216	337	349	267	267	126	129	244	250
O91	Open-pollination	344	350	277	277	173	173	277	277	250	264	258	270	335	335	255	255	131	145	337	351	237	237	115	115	276	278	135	138	126	126	216	216	343	343	267	267	126	129	208	250
O92	Open-pollination	332	350	269	269	173	173	277	279	248	254	270	270	335	335	255	255	131	135	345	345	237	237	109	115	276	290	123	135	126	126	216	219	337	349	267	267	126	129	244	250
O93	Open-pollination	336	354	269	269	173	173	277	277	250	250	258	258	335	335	255	258	131	133	337	337	237	237	109	115	276	278	123	135	126	126	216	216	337	337	267	270	126	129	208	242
O94	Open-pollination	336	358	265	277	173	173	277	281	250	256	258	268	335	335	255	264	131	133	345	359	237	237	109	115	266	276	138	138	126	126	216	216	337	343	267	267	129	129	244	250
O95	Open-pollination	350	356	277	277	173	173	277	285	248	254	270	270	335	335	255	261	131	131	337	355	237	237	109	109	276	280	138	138	126	128	216	216	337	343	267	267	126	129	208	252
O96	Open-pollination	350	356	265	269	173	175	277	281	254	256	258	270	335	335	255	264	129	131	337	341	237	237	115	115	276	278	135	138	126	128	216	216	343	349	267	267	126	129	208	250
O97	Open-pollination	336	342	267	277	173	179	277	281	254	256	258	258	335	335	255	255	129	131	337	341	237	237	109	115	276	278	135	138	120	126	216	219	337	349	264	267	126	129	242	244
O98	Open-pollination	336	336	269	277	173	175	277	281	250	260	270	270	335	338	255	255	129	131	345	359	237	237	109	115	276	276	123	138	118	126	216	216	343	343	264	267	129	129	208	256
O99	Open-pollination	336	358	265	269	173	173	277	281	250	256	268	270	335	335	255	264	131	133	345	359	237	237	109	109	276	276	135	135	126	126	216	219	343	343	267	267	126	129	208	208
O100	Open-pollination	336	344	267	277	173	173	277	279	254	256	258	270	335	335	255	255	129	131	345	349	237	237	109	115	276	276	123	138	118	126	216	216	343	349	267	267	126	129	208	242
O101	Open-pollination	336	342	267	277	173	173	277	279	250	256	258	258	335	335	255	255	129	131	345	349	237	237	109	115	276	276	135	138	120	126	216	216	337	349	267	267	126	129	242	244
O102	Open-pollination	342	350	267	277	173	173	277	281	254	256	258	270	335	335	255	264	129	131	341	345	237	237	109	115	276	276	123	138	118	126	216	216	337	349	267	267	126	129	242	244
O103	Open-pollination	350	354	265	265	173	173	277	277	254	256	258	270	335	335	255	255	131	131	337	345	237	237	109	112	276	278	123	138	126	126	216	219	337	337	264	267	126	129	244	246
O104	Open-pollination	350	350	277	277	173	173	277	281	250	256	258	270	335	335	255	255	129	131	337	341	237	237	109	115	276	276	135	138	120	126	216	219	337	343	264	267	126	129	244	244
O105	Open-pollination	336	358	273	277	173	175	277	277	250	254	260	270	335	335	255	255	129	131	337	345	237	237	115	115	276	276	138	138	118	126	216	216	337	343	267	267	129	129	208	244
O106	Open-pollination	336	356	277	277	173	173	277	285	254	256	258	268	335	335	255	258	129	131	345	355	237	237	109	115	276	282	138	138	126	126	216	216	343	346	267	267	126	129	244	250
O107	Open-pollination	336	344	269	273	173	179	277	281	254	256	258	270	335	335	255	255	129	131	341	345	237	237	109	115	276	278	123	135	118	126	216	216	337	343	264	267	126	129	244	244
O108	Open-pollination	336	350	277	277	173	173	277	279	250	256	258	270	335	335	255	255	131	133	337	349	237	237	115	115	266	276	135	135	126	126	216	219	337	343	267	267	129	129	208	244
O109	Open-pollination	336	346	269	271	173	173	277	281	248	250	258	258	335	335	255	255	129	131	345	359	234	237	109	115	276	292	123	138	126	126	216	216	337	343	264	267	126	129	244	250
O110	Open-pollination	350	356	277	281	173	173	277	285	254	256	258	268	335	335	255	261	131	131	345	355	237	237	109	109	276	282	135	138	126	126	216	216	337	343	267	267	126	129	208	252
O111	Open-pollination	350	350	277	279	173	177	277	277	248	250	270	270	332	335	255	255	129	131	345	363	237	237	115	115	276	278	123	135	126	126	216	216	337	343	264	267	129	129	242	244
O112	Open-pollination	332	336	271	277	173	173	277	281	248	254	260	270	335	338	255	258	129	131	345	359	234	237	109	115	276	278	138	138	126	126	216	216	343	349	264	267	126	129	208	256
O113	Open-pollination	342	350	277	277	173	173	277	281	250	256	258	270	335	335	255	255	129	131	337	341	237	237	109	115	276	276	135	138	120	126	216	219	337	343	264	267	126	129	244	244
O114	Open-pollination	336	358	273	277	173	175	277	277	250	254	260	270	335	335	255	255	129	131	337	345	237	237	115	115	276	276	138	138	118	126	216	216	337	343	267	267	129	129	208	244
O115	Open-pollination	350	350	269	273	173	173	277	281	254	256	258	268	335	335	255	255	131	133	337	359	237	237	109	109	266	276	138	138	126	126	216	219	343	343	264	264	126	129	208	208
O116	Open-pollination	336	354	269	269	173	173	277	277	250	256	258	270	335	335	255	255	131	131	337	337	237	237	109	112	276	278	138	141	126	126	216	216	337	343	264	267	126	129	208	246
O117	Open-pollination	344	350	267	277	173	179	277	281	250	256	270	270	335	335	255	255	129	131	337	341	237	237	115	115	276	278	138	138	120	126	216	216	337	349	264	267	126	129	244	244
O118	Open-pollination	346	350	269	271	173	173	277	279	250	260	260	270	335	338	255	258	129	131	345	375	237	237	109	115	276	292	123	135	126	126	216	216	337	343	264	267	126	129	244	256
O119	Open-pollination	336	358	269	273	173	173	277	279	250	256	268	270	335	335	255	264	129	131	337	349	237	237	109	115	276	276	138	138	126	126	216	216	337	343	267	267	126	129	208	250
O120	Open-pollination	350	350	273	277	173	173	277	281	250	256	270	270	335	335	255	255	129	131	345	359	237	237	109	115	266	276	138	138	126	126	216	216	337	343	267	267	126	129	244	250
O121	Open-pollination	350	358	265	269	173	173	277	279	254	256	258	268	335	335	255	264	129	131	337	349	237	237	109	115	276	276	138	138	126	126	216	216	343	343	264	267	126	129	208	250
O122	Open-pollination	350	350	265	269	173	175	277	281	248	254	258	268	335	338	255	264	129	131	337	341	237	237	109	115	276	278	138	138	126	128	216	219	343	343	267	267	126	129	208	246
O123	Open-pollination	336	344	269	269	173	173	277	279	254	256	258	268	335	335	255	255	129	131	345	349	237	237	109	109	276	278	138	138	120	126	216	219	337	349	267	267	126	129	242	244
O124	Open-pollination	336	346	271	277	173	173	277	279	250	260	258	268	335	338	255	255	131	135	337	337	237	237	109	109	276	292	123	135	126	126	216	216	343	349	264	267	126	129	208	256
O125	Open-pollination	336	346	269	269	173	173	277	281	248	250	258	270	335	338	255	255	129	131	337	359	237	237	109	115	276	292	138	138	126	126	216	216	337	349	267	267	126	129	244	256
O126	Open-pollination	336	346	269	271	173	173	277	279	248	250	258	270	335	338	255	255	131	135	345	345	237	237	115	115	276	292	138	138	126	126	216	216	337	349	267	267	126	129	244	256
O127	Open-pollination	336	358	269	273	173	173	277	281	250	256	268	270	335	335	255	255	129	131	345	359	237	237	115	115	276	276	135	138	126	126	216	216	337	343	267	267	126	129	244	250
O128	Open-pollination	336	356	269	273	173	173	277	277	250	256	258	270	332	335	255	261	129	131	345	355	237	237	109	109	276	278	138	141	126	126	216	219	343	343	264	267	126	129	208	246
O129	Open-pollination	336	344	267	277	173	173	277	281	250	256	258	258	335	335	255	264	121	123	337	341	237	237	109	109	276	278	123	138	118	126	216	219	343	343	267	267	126	129	208	244
O130	Open-pollination	342	350	277	277	173	179	277	281	254	256	258	258	335	335	255	264	129	131	337	341	237	237	109	115	276	276	135	138	120	126	216	216	343	343	267	267	126	129	208	242
O131	Open-pollination	346	350	265	277	173	175	277	281	254	256	258	268	335	338	255	258	129	131	337	341	237	237	109	115	276	278	135	138	126	126	216	219	343	343	267	267	126	129	208	246
O132	Open-pollination	342	350	277	277	173	173	277	279	250	256	258	258	335	335	255	264	129	131	345	349	237	237	109	109	276	276	123	138	118	126	216	216	337	343	264	267	126	129	244	244
O133	Open-pollination	334	350	273	277	173	179	277	285	250	260	258	270	335	335	255	261	129	131	337	345	237	237	109	115	276	276	138	144	126	126	216	219	337	343	264	267	126	129	244	244
O134	Open-pollination	350	358	265	269	173	173	277	279	254	256	270	270	335	335	255	264	129	131	345	349	237	237	115	115	276	276	135	138	126	126	216	219	337	343	264	267	126	129	208	244
O135	Open-pollination	350	350	269	273	173	173	277	279	250	256	258	268	335	335	255	255	129	131	345	349	237	237	115	115	276	276	135	135	126	126	216	219	343	343	267	267	129	129	208	250
O136	Open-pollination	336	356	273	277	163	173	277	299	250	256	258	268	332	335	255	261	131	131	341	345	237	237	109	109	276	278	135	141	126	126	216	222	337	343	264	267	126	129	208	246
O137	Open-pollination	350	350	275	277	173	173	277	279	254	256	268	268	332	335	255	255	131	131	337	371	237	237	109	115	276	276	135	138	126	126	216	219	343	343	267	267	126	129	208	250
O138	Open-pollination	332	336	269	271	173	173	277	279	250	260	260	270	335	338	255	258	129	131	345	345	234	237	115	115	276	278	135	138	126	126	216	216	343	349	264	267	126	129	208	256
O139	Open-pollination	336	358	273	277	173	173	277	279	254	256	268	270	335	335	255	255	131	133	345	349	237	237	109	115	266	276	135	138	126	126	216	219	343	343	267	267	126	129	208	208
O140	Open-pollination	336	342	271	277	173	179	277	277	250	256	270	270	335	335	255	255	129	131	337	351	237	237	109	115	266	276	135	138	126	128	216	216	337	337	264	267	126	129	244	244
O141	Open-pollination	336	342	277	277	173	173	277	279	250	256	258	258	335	335	255	255	129	131	337	349	237	237	109	109	276	278	138	138	120	126	216	219	343	343	264	267	126	129	208	244
O142	Open-pollination	336	342	277	277	173	173	277	279	254	256	258	258	335	335	255	255	129	131	337	349	237	237	109	109	276	278	135	138	120	126	216	216	343	349	267	267	126	129	242	244
O143	Open-pollination	350	356	265	269	173	173	277	277	250	254	258	258	335	338	255	267	131	131	337	341	225	237	109	109	276	278	135	138	126	126	216	216	343	343	264	267	126	129	208	244
O144	Open-pollination	344	350	277	277	173	173	277	281	254	256	258	270	335	335	255	267	129	131	337	359	237	237	109	115	276	278	135	138	120	126	216	216	343	343	264	267	129	129	208	256
O145	Open-pollination	336	342	269	269	173	173	277	279	250	256	270	270	335	335	255	264	129	131	337	349	237	237	109	115	276	276	123	138	118	126	216	216	337	343	264	267	129	129	244	244
O146	Open-pollination	350	356	269	269	173	173	277	285	248	254	268	268	335	335	255	261	131	131	345	355	237	237	109	115	276	276	135	138	126	128	216	219	337	337	267	267	126	129	208	252
O147	Open-pollination	336	358	265	277	163	173	277	279	254	256	258	270	335	335	255	264	131	133	345	349	237	237	115	115	276	276	138	138	126	126	216	219	337	343	267	267	126	129	208	244
O148	Open-pollination	336	344	269	269	173	173	277	279	250	256	258	258	335	335	255	255	129	131	345	349	237	237	109	115	276	278	123	138	118	126	216	216	343	343	267	267	129	129	208	244
O149	Open-pollination	336	344	277	277	173	173	277	281	250	256	258	270	335	335	255	264	129	131	337	341	237	237	109	115	276	276	123	138	120	126	216	216	337	349	267	267	126	129	242	244
O150	Open-pollination	336	342	267	277	173	173	277	281	254	256	258	270	335	335	255	255	129	131	337	341	237	237	109	115	276	276	123	138	118	126	216	216	343	343	267	267	126	129	244	244
O151	Open-pollination	336	354	269	269	173	175	277	289	254	254	258	258	335	335	255	258	131	133	337	343	237	237	115	115	276	278	138	138	118	126	216	219	343	349	267	267	129	129	208	242
O152	Open-pollination	336	342	277	277	173	179	277	279	254	256	258	270	335	335	255	264	129	131	337	349	237	237	115	115	276	276	123	135	118	126	216	216	343	343	267	267	126	129	208	244
O153	Open-pollination	350	350	265	269	173	173	277	279	254	256	268	270	335	335	255	264	131	133	337	349	237	237	109	115	266	276	138	138	126	126	216	219	343	343	267	267	126	129	208	250
O154	Open-pollination	336	340	277	289	173	173	277	277	250	254	266	270	335	338	255	258	129	131	337	355	237	237	109	115	276	278	135	138	126	126	216	219	337	337	267	267	126	129	244	250
O155	Open-pollination	350	354	269	269	175	175	277	281	250	250	258	268	335	338	255	255	129	131	345	359	237	237	115	115	276	276	135	138	126	126	216	219	337	343	264	267	129	129	244	256
O156	Open-pollination	336	342	277	277	173	173	277	281	254	256	258	258	335	335	252	255	129	131	337	341	237	237	109	109	276	276	135	138	120	126	216	219	337	343	264	267	126	129	244	244
O157	Open-pollination	350	354	269	277	173	173	277	277	254	260	258	268	335	335	255	255	129	131	337	355	237	237	115	115	276	278	138	138	126	126	216	216	343	343	267	267	126	129	208	208
O158	Open-pollination	344	350	269	269	173	173	277	281	250	256	258	270	335	335	255	255	129	131	341	345	237	237	115	115	276	276	135	138	120	126	216	216	337	343	264	267	126	129	244	244
O159	Open-pollination	336	350	265	277	173	173	277	281	254	256	270	270	335	335	255	255	129	131	345	359	237	237	115	115	266	276	135	138	126	126	216	219	337	343	267	267	126	129	208	208
O160	Open-pollination	344	350	277	277	173	173	277	281	254	256	258	258	335	335	255	264	129	131	345	359	237	237	115	115	276	278	135	138	126	126	216	219	343	349	267	267	126	129	208	256
O161	Open-pollination	336	342	277	277	173	179	277	281	250	256	258	258	335	335	255	255	129	131	337	341	237	237	115	115	276	276	135	138	120	126	216	219	343	349	264	267	126	129	244	244
O162	Open-pollination	350	350	273	277	173	173	277	279	254	256	258	270	335	335	255	264	131	133	345	349	237	237	115	115	266	276	138	138	126	126	216	216	337	343	267	267	129	129	208	208
O163	Open-pollination	344	350	275	277	173	173	277	277	254	256	260	270	335	335	255	261	129	131	337	355	237	237	109	115	276	276	123	138	126	126	216	216	337	337	267	267	126	129	244	246
O164	Open-pollination	342	350	267	277	173	179	277	281	254	256	258	270	335	335	255	255	129	131	337	341	237	237	109	115	276	276	138	138	120	126	216	216	337	343	264	267	126	129	244	244
O165	Open-pollination	332	350	269	271	173	173	277	281	254	260	270	270	335	335	255	258	129	131	345	359	237	237	115	115	276	278	135	138	126	126	216	219	337	343	264	267	126	129	244	250
O166	Open-pollination	332	350	269	271	173	173	277	279	246	250	258	270	335	335	255	258	129	131	337	337	237	237	115	115	276	278	138	141	126	126	216	216	337	343	267	267	126	129	208	248
O167	Open-pollination	336	344	267	269	173	179	277	279	254	256	258	258	335	335	255	264	129	131	345	349	237	237	109	115	276	276	123	138	118	126	216	216	337	343	264	267	126	129	244	244
O168	Open-pollination	336	356	277	281	173	173	277	285	250	256	270	270	335	335	255	258	129	131	337	355	237	237	109	115	276	282	135	138	126	126	216	216	337	343	267	267	126	129	208	252
O169	Open-pollination	336	342	269	281	173	179	277	279	254	256	258	258	335	335	255	264	129	131	345	349	237	237	109	115	276	276	123	135	118	126	216	216	337	343	264	267	126	129	244	244
O170	Open-pollination	344	350	269	279	173	173	277	277	248	248	258	258	335	335	255	258	131	133	337	337	237	237	109	115	276	278	135	141	126	126	216	219	337	343	267	270	126	129	208	242
O171	Open-pollination	332	336	267	269	173	173	277	279	254	260	260	270	335	338	255	258	131	135	345	345	234	237	109	115	276	292	123	138	126	126	216	219	337	349	264	267	126	129	244	256
O172	Open-pollination	336	344	267	269	173	173	277	281	254	256	258	270	335	335	255	264	129	131	341	345	237	237	109	115	276	278	138	138	120	126	216	216	343	349	267	267	126	129	242	244
O173	Open-pollination	336	336	267	269	173	179	277	281	250	256	258	258	335	335	255	264	129	131	337	341	237	237	109	109	276	278	123	138	118	126	216	219	343	343	267	267	126	129	208	244
O174	Open-pollination	336	358	269	273	173	173	277	281	254	256	270	270	335	335	255	255	129	131	337	359	237	237	115	115	276	276	135	135	126	126	216	216	343	343	267	267	126	129	208	208
O175	Open-pollination	336	358	265	277	173	173	277	281	250	256	258	268	335	335	255	264	131	133	345	359	237	237	109	115	266	276	138	138	126	126	216	216	337	343	267	267	129	129	244	250
O176	Open-pollination	336	344	267	277	173	179	277	279	250	256	270	270	335	335	255	255	129	131	345	349	237	237	109	115	276	278	123	135	118	126	216	216	343	343	264	267	126	129	208	244
O177	Open-pollination	344	350	277	285	173	173	277	299	250	256	258	270	332	335	255	264	129	131	337	341	237	237	115	115	276	278	135	138	126	126	216	219	337	343	267	267	126	129	208	244
O178	Open-pollination	350	350	265	269	173	175	277	281	254	256	270	270	335	335	255	258	129	131	341	345	237	237	109	115	276	278	135	138	126	128	216	219	343	349	267	267	126	129	208	248
O179	Open-pollination	342	350	277	277	173	179	277	279	250	256	258	258	335	335	255	255	129	131	345	349	237	237	109	109	276	276	138	138	120	126	216	216	343	343	264	267	126	129	208	244
O180	Open-pollination	350	350	265	277	173	173	277	279	254	256	270	270	335	335	255	255	131	133	337	349	237	237	109	109	266	276	135	138	126	126	216	216	337	343	267	267	129	129	208	244
O181	Open-pollination	336	336	269	269	173	175	277	279	250	250	260	270	335	335	255	255	129	131	337	347	237	240	115	115	276	278	135	138	126	126	216	219	337	349	264	267	126	129	244	250
O182	Open-pollination	350	356	267	269	173	173	277	285	248	250	270	270	335	335	255	261	129	131	337	355	237	237	109	115	276	282	138	138	126	128	216	216	337	343	267	267	126	129	208	252
O183	Open-pollination	336	344	267	269	173	179	277	281	250	256	258	258	335	335	255	264	129	131	337	341	237	237	109	109	276	276	123	135	118	126	216	216	343	349	267	267	126	129	208	242
O184	Open-pollination	342	350	267	277	173	179	277	281	254	256	258	270	335	335	255	264	129	131	337	341	237	237	109	115	278	278	138	138	120	126	216	219	343	343	264	267	126	129	250	250
O185	Open-pollination	350	358	265	277	173	173	277	281	250	256	258	268	335	335	255	264	131	133	345	359	237	237	115	115	276	276	135	135	126	126	216	216	343	343	267	267	126	129	208	250
O186	Open-pollination	336	336	277	279	173	173	277	277	250	254	270	270	335	338	255	255	129	131	337	355	237	237	109	115	276	278	138	138	126	126	216	219	337	343	264	267	129	129	208	256
O187	Open-pollination	350	356	269	281	173	173	277	285	248	250	270	270	335	335	255	261	129	131	337	355	237	237	109	115	276	282	138	138	126	128	216	216	337	343	267	267	126	129	208	252
O188	Open-pollination	350	358	273	277	173	173	277	279	254	256	258	268	335	335	255	264	129	131	337	349	237	237	109	115	266	276	138	138	126	126	216	219	337	343	267	267	129	129	208	244
O189	Open-pollination	346	350	265	269	173	175	277	281	254	256	270	270	335	338	255	264	129	131	341	345	237	237	109	115	276	278	138	138	126	126	216	219	343	343	267	267	126	129	244	246
O190	Open-pollination	342	350	269	269	173	173	277	281	254	256	258	270	335	335	255	264	129	131	341	345	237	237	109	115	276	276	123	135	118	126	216	216	343	349	267	267	126	129	208	242
O191	Open-pollination	332	336	271	277	173	173	277	281	254	260	258	258	335	338	255	255	131	135	337	359	234	237	109	115	276	278	135	138	126	126	216	216	343	349	264	267	126	129	208	256
O192	Open-pollination	336	342	267	277	173	179	277	281	250	256	258	270	335	335	255	255	129	131	341	345	237	237	109	115	276	276	138	138	120	126	216	216	343	349	267	267	126	129	208	242
O193	Open-pollination	336	350	275	277	173	173	277	279	250	250	258	268	335	335	255	255	131	131	337	337	237	237	115	115	276	276	135	138	126	126	216	216	343	343	267	267	120	129	244	252
O194	Open-pollination	342	350	267	269	173	179	277	279	250	254	258	270	335	335	255	264	129	131	337	349	237	237	109	115	276	276	135	138	120	126	216	219	337	349	267	267	126	129	242	244
O195	Open-pollination	336	350	275	277	173	173	277	279	250	254	270	270	335	335	255	255	131	131	337	345	237	237	109	115	276	276	135	135	126	128	216	216	343	343	267	267	126	129	208	252
O196	Open-pollination	344	350	277	277	173	173	277	281	250	250	258	268	335	335	255	255	129	131	341	345	237	237	115	115	276	276	138	138	120	126	216	216	343	343	264	267	126	129	208	244
O197	Open-pollination	344	350	269	269	173	173	277	279	250	258	258	268	335	335	255	264	129	131	345	349	237	237	115	115	276	278	123	135	118	126	216	219	343	343	264	267	126	129	208	244
O198	Open-pollination	336	344	269	269	173	179	277	281	250	254	258	258	335	335	255	264	129	131	337	341	237	237	109	109	276	276	123	138	118	126	216	216	343	343	264	267	126	129	208	244
O199	Open-pollination	336	358	265	277	173	173	277	281	250	250	268	270	335	335	255	255	131	133	345	359	237	237	106	106	276	276	138	138	126	126	216	216	337	343	267	267	126	129	208	244
O200	Open-pollination	336	344	277	277	173	179	277	279	250	250	258	270	335	335	255	255	129	131	337	349	237	237	109	115	276	276	123	138	118	126	216	219	337	349	267	267	126	129	242	244
S1	Self-pollination	336	350	269	269	173	173	277	277	250	254	258	270	335	335	255	255	131	131	345	345	237	237	109	115	276	276	135	135	126	126	216	219	337	337	267	267	129	129	244	244
S2	Self-pollination	336	336	277	277	173	173	277	277	250	254	258	270	335	335	255	255	131	131	337	337	237	237	115	115	276	276	135	138	126	126	216	219	343	343	267	267	120	129	244	244
S3	Self-pollination	336	350	277	277	173	173	277	277	250	254	270	270	335	335	255	255	131	131	337	345	237	237	109	115	276	276	135	138	126	126	216	219	337	343	267	267	120	129	244	244
S4	Self-pollination	336	350	269	269	173	173	277	277	254	254	258	270	335	335	255	255	131	131	337	345	237	237	109	115	276	276	135	138	126	126	216	216	337	343	267	267	129	129	244	244
S5	Self-pollination	336	350	269	277	173	173	277	277	250	254	258	270	335	335	255	255	131	131	337	345	237	237	109	109	276	276	138	138	126	126	216	219	337	343	267	267	129	129	244	244
S6	Self-pollination	350	350	269	277	173	173	277	277	250	254	258	270	335	335	255	255	131	131	337	345	237	237	109	115	276	276	138	138	126	126	216	219	337	337	267	267	120	129	244	244
S7	Self-pollination	336	350	269	277	173	173	277	277	250	250	270	270	335	335	255	255	131	131	337	345	237	237	109	109	276	276	138	138	126	126	216	216	337	343	267	267	120	129	244	244
S8	Self-pollination	336	336	269	277	173	173	277	277	250	254	258	270	335	335	255	255	131	131	345	345	237	237	109	115	276	276	135	138	126	126	216	219	343	343	267	267	120	129	208	208
S9	Self-pollination	336	336	269	277	173	173	277	277	250	254	270	270	335	335	255	255	131	131	345	345	237	237	109	109	276	276	135	138	126	126	219	219	337	343	267	267	120	129	244	244
S10	Self-pollination	336	350	269	269	173	173	277	277	250	250	270	270	335	335	255	255	131	131	345	345	237	237	109	115	276	276	135	135	126	126	216	219	337	343	267	267	129	129	244	244
S11	Self-pollination	336	336	269	277	173	173	277	277	250	254	258	270	335	335	255	255	131	131	337	337	237	237	109	115	276	276	135	138	126	126	216	216	337	337	267	267	120	129	244	244
S12	Self-pollination	336	336	277	277	173	173	277	277	250	250	258	270	335	335	255	255	131	131	337	337	237	237	115	115	276	276	135	138	126	126	219	219	337	343	267	267	120	129	244	244
S13	Self-pollination	350	350	277	277	173	173	277	277	250	250	258	270	335	335	255	255	131	131	337	345	237	237	109	109	276	276	135	138	126	126	216	219	343	343	267	267	120	129	208	208
S14	Self-pollination	336	350	269	277	173	173	277	277	250	250	258	270	335	335	255	255	131	131	337	345	237	237	109	115	276	276	135	138	126	126	216	216	337	343	267	267	120	129	244	244
S15	Self-pollination	336	350	269	277	173	173	277	277	250	250	258	270	335	335	255	255	131	131	345	345	237	237	109	109	276	276	135	138	126	126	216	216	337	343	267	267	120	129	244	244
S16	Self-pollination	336	336	269	277	173	173	277	277	250	254	258	270	335	335	255	255	131	131	337	345	237	237	109	109	276	276	135	138	126	126	216	216	337	343	267	267	120	129	244	244
S17	Self-pollination	336	350	269	269	173	173	277	277	250	254	270	270	335	335	255	255	131	131	337	345	237	237	109	115	276	276	135	138	126	126	216	219	337	343	267	267	120	129	244	244
S18	Self-pollination	336	350	269	277	173	173	277	277	250	254	258	270	335	335	255	255	131	131	337	345	237	237	109	115	276	276	135	138	126	126	219	219	337	337	267	267	120	129	244	244
S19	Self-pollination	336	350	269	277	173	173	277	277	250	250	270	270	335	335	255	255	131	131	337	337	237	237	109	115	276	276	135	135	126	126	216	216	343	343	267	267	120	129	208	208
S20	Self-pollination	350	350	269	269	173	173	277	277	254	254	258	270	335	335	255	255	131	131	337	345	237	237	109	109	276	276	138	138	126	126	219	219	337	343	267	267	129	129	244	244
S21	Self-pollination	350	350	269	269	173	173	277	277	250	250	270	270	335	335	255	255	131	131	337	345	237	237	109	115	276	276	138	138	126	126	216	219	343	343	267	267	120	129	244	244
S22	Self-pollination	336	336	269	277	173	173	277	277	254	254	258	270	335	335	255	255	131	131	337	337	237	237	109	115	276	276	135	135	126	126	216	219	337	343	267	267	120	129	244	244
S23	Self-pollination	336	336	269	269	173	173	277	277	250	250	258	258	335	335	255	255	131	131	345	345	237	237	109	115	276	276	135	138	126	126	216	219	337	343	267	267	120	129	208	208
S24	Self-pollination	336	350	269	277	173	173	277	277	250	254	258	270	335	335	255	255	131	131	337	345	237	237	115	115	276	276	135	135	126	126	216	219	337	337	267	267	120	129	244	244
S25	Self-pollination	336	350	269	269	173	173	277	277	250	250	258	270	335	335	255	255	131	131	337	345	237	237	109	115	276	276	135	135	126	126	219	219	337	343	267	267	129	129	208	208
S26	Self-pollination	350	350	277	277	173	173	277	277	250	254	258	258	335	335	255	255	131	131	345	345	237	237	109	115	276	276	135	138	126	126	216	219	337	343	267	267	120	129	244	244
S27	Self-pollination	336	350	269	269	173	173	277	277	250	254	258	270	335	335	255	255	131	131	337	337	237	237	109	109	276	276	135	135	126	126	216	219	337	343	267	267	120	129	244	244
S28	Self-pollination	336	350	269	277	173	173	277	277	250	254	258	270	335	335	255	255	131	131	337	345	237	237	109	115	276	276	135	138	126	126	219	219	343	343	267	267	120	129	244	244
S29	Self-pollination	336	350	277	277	173	173	277	277	250	254	258	270	335	335	255	255	131	131	345	345	237	237	115	115	276	276	135	138	126	126	216	216	337	337	267	267	120	129	244	244
S30	Self-pollination	336	350	277	277	173	173	277	277	250	254	270	270	335	335	255	255	131	131	337	345	237	237	109	115	276	276	135	138	126	126	219	219	337	343	267	267	129	129	244	244
S31	Self-pollination	336	350	269	277	173	173	277	277	250	250	258	270	335	335	255	255	131	131	337	337	237	237	115	115	276	276	138	138	126	126	216	219	343	343	267	267	120	129	244	244
S32	Self-pollination	336	350	277	277	173	173	277	277	250	250	270	270	335	335	255	255	131	131	337	345	237	237	115	115	276	276	135	138	126	126	216	219	337	343	267	267	129	129	244	244
S33	Self-pollination	350	350	269	277	173	173	277	277	250	254	258	270	335	335	255	255	131	131	337	345	237	237	109	115	276	276	135	138	126	126	219	219	337	337	267	267	120	129	244	244
S34	Self-pollination	336	336	269	277	173	173	277	277	250	250	258	270	335	335	255	255	131	131	345	345	237	237	109	109	276	276	135	138	126	126	216	219	337	337	267	267	120	129	244	244
S36	Self-pollination	336	350	269	277	173	173	277	277	250	254	258	270	335	335	255	255	131	131	337	345	237	237	115	115	276	276	138	138	126	126	219	219	337	343	267	267	120	129	244	244
S37	Self-pollination	350	350	269	269	173	173	277	277	250	254	258	270	335	335	255	255	131	131	337	345	237	237	109	115	276	276	135	138	126	126	216	219	337	337	267	267	120	129	244	244
S38	Self-pollination	350	350	269	277	173	173	277	277	254	254	258	270	335	335	255	255	131	131	337	345	237	237	109	109	276	276	138	138	126	126	216	219	337	343	267	267	120	129	244	244
S39	Self-pollination	336	336	269	269	173	173	277	277	254	254	258	270	335	335	255	255	131	131	345	345	237	237	109	115	276	276	138	138	126	126	219	219	343	343	267	267	120	129	244	244
S40	Self-pollination	336	336	277	277	173	173	277	277	254	254	270	270	335	335	255	255	131	131	345	345	237	237	109	109	276	276	138	138	126	126	216	219	343	343	267	267	120	129	244	244
S41	Self-pollination	336	350	269	277	173	173	277	277	250	254	258	270	335	335	255	255	131	131	337	345	237	237	109	109	276	276	135	138	126	126	216	219	337	343	267	267	120	129	244	244
S42	Self-pollination	336	350	269	269	173	173	277	277	250	250	258	270	335	335	255	255	131	131	345	345	237	237	109	109	276	276	135	138	126	126	216	216	337	343	267	267	129	129	244	244
S43	Self-pollination	336	350	269	277	173	173	277	277	254	254	258	270	335	335	255	255	131	131	345	345	237	237	109	115	276	276	135	138	126	126	216	219	337	337	267	267	120	129	244	244
S44	Self-pollination	336	336	269	277	173	173	277	277	250	254	270	270	335	335	255	255	131	131	337	345	237	237	109	115	276	276	135	138	126	126	216	219	337	343	267	267	120	129	244	244
S47	Self-pollination	350	350	269	277	173	173	277	277	254	254	258	258	335	335	255	255	131	131	337	345	237	237	109	115	276	276	135	135	126	126	216	219	337	343	267	267	120	129	244	244
S48	Self-pollination	336	336	269	277	173	173	277	277	250	254	258	270	335	335	255	255	131	131	337	345	237	237	109	115	276	276	135	138	126	126	216	219	337	343	267	267	120	129	244	244
S49	Self-pollination	350	350	269	277	173	173	277	277	254	254	258	270	335	335	255	255	131	131	345	345	237	237	109	115	276	276	135	138	126	126	216	219	337	343	267	267	129	129	244	244
S50	Self-pollination	336	350	269	269	173	173	277	277	250	250	270	270	335	335	255	255	131	131	345	345	237	237	109	115	276	276	135	138	126	126	216	216	343	343	267	267	129	129	208	208
S51	Self-pollination	336	350	269	277	173	173	277	277	250	254	258	270	335	335	255	255	131	131	337	337	237	237	109	115	276	276	135	138	126	126	216	216	337	343	267	267	120	129	208	208
S54	Self-pollination	336	350	269	269	173	173	277	277	250	250	270	270	335	335	255	255	131	131	345	345	237	237	109	115	276	276	135	138	126	126	216	219	337	337	267	267	120	129	244	244
S55	Self-pollination	336	350	277	277	173	173	277	277	250	254	258	258	335	335	255	255	131	131	337	337	237	237	109	109	276	276	135	138	126	126	219	219	337	343	267	267	120	129	244	244
S56	Self-pollination	336	336	269	277	173	173	277	277	250	250	258	270	335	335	255	255	131	131	345	345	237	237	109	109	276	276	138	138	126	126	216	219	343	343	267	267	120	129	208	208
S57	Self-pollination	350	350	269	277	173	173	277	277	250	254	258	270	335	335	255	255	131	131	337	345	237	237	109	115	276	276	138	138	126	126	216	219	337	343	267	267	120	129	244	244
S58	Self-pollination	336	336	269	269	173	173	277	277	250	254	270	270	335	335	255	255	131	131	337	345	237	237	109	109	276	276	135	138	126	126	216	219	337	337	267	267	129	129	208	208
S59	Self-pollination	336	350	269	269	173	173	277	277	250	254	258	270	335	335	255	255	131	131	345	345	237	237	109	115	276	276	135	138	126	126	216	219	337	343	267	267	120	129	244	244
S60	Self-pollination	336	350	269	277	173	173	277	277	254	254	258	270	335	335	255	255	131	131	337	345	237	237	109	115	276	276	135	138	126	126	216	219	343	343	267	267	129	129	208	208
S61	Self-pollination	336	350	269	277	173	173	277	277	250	254	258	270	335	335	255	255	131	131	345	345	237	237	109	115	276	276	138	138	126	126	216	216	337	337	267	267	120	129	244	244
S62	Self-pollination	336	350	269	269	173	173	277	277	250	250	258	270	335	335	255	255	131	131	337	345	237	237	109	109	276	276	138	138	126	126	216	219	337	337	267	267	120	129	208	208
S64	Self-pollination	336	350	269	277	173	173	277	277	250	254	270	270	335	335	255	255	131	131	337	345	237	237	115	115	276	276	135	135	126	126	216	219	337	343	267	267	129	129	244	244
S65	Self-pollination	336	350	269	277	173	173	277	277	250	250	258	270	335	335	255	255	131	131	345	345	237	237	115	115	276	276	135	135	126	126	216	219	337	343	267	267	120	129	244	244
S66	Self-pollination	350	350	269	277	173	173	277	277	254	254	258	258	335	335	255	255	131	131	337	345	237	237	109	115	276	276	135	138	126	126	216	219	337	343	267	267	120	129	244	244
S67	Self-pollination	336	350	269	269	173	173	277	277	250	250	258	270	335	335	255	255	131	131	337	337	237	237	109	115	276	276	135	138	126	126	216	216	343	343	267	267	120	129	208	244
S68	Self-pollination	336	350	269	277	173	173	277	277	250	250	270	270	335	335	255	255	131	131	337	345	237	237	109	115	276	276	135	135	126	126	216	219	343	343	267	267	120	129	208	208
S69	Self-pollination	336	336	277	277	173	173	277	277	250	254	270	270	335	335	255	255	131	131	337	345	237	237	109	109	276	276	135	138	126	126	216	219	337	343	267	267	120	129	244	244
S70	Self-pollination	336	350	277	277	173	173	277	277	250	254	258	270	335	335	255	255	131	131	345	345	237	237	109	115	276	276	135	138	126	126	219	219	337	343	267	267	120	129	244	244
S71	Self-pollination	336	336	269	269	173	173	277	277	250	254	258	270	335	335	255	255	131	131	337	345	237	237	109	115	276	276	138	138	126	126	216	216	343	343	267	267	120	129	244	244
S72	Self-pollination	336	350	269	277	173	173	277	277	250	254	270	270	335	335	255	255	131	131	337	337	237	237	109	115	276	276	135	138	126	126	216	216	337	343	267	267	120	129	244	244
S73	Self-pollination	336	336	269	277	173	173	277	277	254	254	258	270	335	335	255	255	131	131	337	337	237	237	109	115	276	276	135	138	126	126	216	216	337	343	267	267	120	129	244	244
S74	Self-pollination	336	336	277	277	173	173	277	277	254	254	258	258	335	335	255	255	131	131	337	345	237	237	109	109	276	276	138	138	126	126	219	219	337	343	267	267	120	129	244	244
S75	Self-pollination	336	350	269	277	173	173	277	277	250	250	258	270	335	335	255	255	131	131	345	345	237	237	109	115	276	276	135	138	126	126	216	216	337	343	267	267	120	129	244	244
S76	Self-pollination	336	350	269	269	173	173	277	277	250	254	270	270	335	335	255	255	131	131	337	345	237	237	109	115	276	276	135	138	126	126	216	219	343	343	267	267	129	129	208	208
S77	Self-pollination	336	350	269	277	173	173	277	277	250	254	270	270	335	335	255	255	131	131	345	345	237	237	109	109	276	276	135	135	126	126	216	216	337	337	267	267	120	129	244	244
S78	Self-pollination	336	350	277	277	173	173	277	277	250	250	270	270	335	335	255	255	131	131	345	345	237	237	109	109	276	276	135	138	126	126	216	216	337	337	267	267	120	129	244	244
S79	Self-pollination	350	350	269	269	173	173	277	277	254	254	258	258	335	335	255	255	131	131	337	337	237	237	109	115	276	276	135	135	126	126	216	219	343	343	267	267	129	129	208	208
S80	Self-pollination	336	336	269	277	173	173	277	277	254	254	270	270	335	335	255	255	131	131	337	345	237	237	109	115	276	276	135	138	126	126	219	219	337	337	267	267	120	129	244	244
S81	Self-pollination	336	350	269	277	173	173	277	277	254	254	258	270	335	335	255	255	131	131	337	345	237	237	115	115	276	276	138	138	126	126	216	216	337	343	267	267	120	120	244	244
S82	Self-pollination	336	350	269	277	173	173	277	277	250	250	258	270	335	335	255	255	131	131	345	345	237	237	115	115	276	276	135	138	126	126	216	216	343	343	267	267	120	120	208	244
S83	Self-pollination	336	350	269	277	173	173	277	277	250	254	258	270	335	335	255	255	131	131	345	345	237	237	109	109	276	276	138	138	126	126	219	219	337	337	267	267	120	129	244	244
S84	Self-pollination	336	350	269	277	173	173	277	277	254	254	258	258	335	335	255	255	131	131	345	345	237	237	109	115	276	276	135	138	126	126	219	219	337	337	267	267	120	120	244	244
S85	Self-pollination	336	336	269	269	173	173	277	277	254	254	258	270	335	335	255	255	131	131	345	345	237	237	109	115	276	276	135	138	126	126	219	219	337	343	267	267	129	129	244	244
S86	Self-pollination	336	350	277	277	173	173	277	277	250	254	258	270	335	335	255	255	131	131	337	337	237	237	115	115	276	276	135	135	126	126	216	219	337	343	267	267	120	129	244	244
S87	Self-pollination	336	350	269	277	173	173	277	277	250	254	258	258	335	335	255	255	131	131	337	337	237	237	109	115	276	276	135	135	126	126	216	219	337	343	267	267	120	129	244	244
S88	Self-pollination	336	350	269	277	173	173	277	277	254	254	258	270	335	335	255	255	131	131	345	345	237	237	109	115	276	276	138	138	126	126	216	216	337	343	267	267	129	129	244	244
S89	Self-pollination	336	350	269	277	173	173	277	277	250	254	258	270	335	335	255	255	131	131	337	345	237	237	109	115	276	276	135	138	126	126	216	219	343	343	267	267	120	120	244	244
S90	Self-pollination	336	350	269	269	173	173	277	277	250	254	258	258	335	335	255	255	131	131	345	345	237	237	115	115	276	276	135	138	126	126	216	219	337	343	267	267	129	129	244	244
S91	Self-pollination	336	336	277	277	173	173	277	277	250	254	270	270	335	335	255	255	131	131	337	345	237	237	109	115	276	276	135	138	126	126	219	219	337	337	267	267	120	129	244	244
S92	Self-pollination	336	350	277	277	173	173	277	277	250	254	258	270	335	335	255	255	131	131	337	345	237	237	109	115	276	276	138	138	126	126	216	216	337	343	267	267	120	120	244	244
S93	Self-pollination	336	336	269	277	173	173	277	277	250	254	258	270	335	335	255	255	131	131	345	345	237	237	109	115	276	276	135	138	126	126	216	219	337	343	267	267	120	129	208	208
S94	Self-pollination	336	350	269	277	173	173	277	277	250	254	258	270	335	335	255	255	131	131	337	337	237	237	109	115	276	276	135	138	126	126	219	219	337	343	267	267	120	129	244	244
S95	Self-pollination	336	350	277	277	173	173	277	277	254	254	258	270	335	335	255	255	131	131	337	345	237	237	109	115	276	276	135	138	126	126	216	219	343	343	267	267	120	129	244	244
S96	Self-pollination	350	350	269	269	173	173	277	277	250	254	258	258	335	335	255	255	131	131	337	345	237	237	115	115	276	276	135	135	126	126	216	219	337	343	267	267	129	129	244	244
S97	Self-pollination	336	350	269	269	173	173	277	277	250	254	270	270	335	335	255	255	131	131	337	345	237	237	109	115	276	276	135	138	126	126	219	219	337	343	267	267	129	129	208	244
S98	Self-pollination	336	336	269	269	173	173	277	277	250	254	258	270	335	335	255	255	131	131	337	345	237	237	109	109	276	276	135	138	126	126	216	219	337	337	267	267	120	129	244	244
S100	Self-pollination	336	350	269	269	173	173	277	277	250	254	258	258	335	335	255	255	131	131	337	345	237	237	109	109	276	276	135	138	126	126	216	219	337	343	267	267	129	129	208	244
S101	Self-pollination	336	336	269	277	173	173	277	277	250	250	270	270	335	335	255	255	131	131	337	337	237	237	109	115	276	276	135	138	126	126	216	219	337	343	267	267	120	129	208	244
S102	Self-pollination	350	350	277	277	173	173	277	277	250	250	258	270	335	335	249	249	131	131	337	345	237	237	109	109	276	276	135	138	126	126	216	216	337	343	267	267	120	129	208	244
S103	Self-pollination	336	350	269	269	173	173	277	277	250	254	258	258	335	335	255	255	131	131	345	345	237	237	109	115	276	276	135	138	126	126	216	219	337	343	267	267	129	129	244	244
S104	Self-pollination	336	350	269	277	173	173	277	277	250	254	258	270	335	335	255	255	131	131	337	337	237	237	109	115	276	276	135	138	120	120	216	216	337	343	267	267	129	129	244	244
S105	Self-pollination	336	350	269	277	173	173	277	277	250	254	258	258	335	335	255	255	131	131	337	337	237	237	109	109	276	276	135	135	126	126	216	216	337	343	267	267	120	129	244	244
S106	Self-pollination	336	336	269	277	173	173	277	277	250	254	270	270	335	335	255	255	131	131	337	337	237	237	109	115	276	276	135	138	126	126	216	219	337	343	267	267	120	129	208	244
S107	Self-pollination	336	350	269	277	173	173	277	277	250	250	258	270	335	335	255	255	131	131	337	345	237	237	109	115	276	276	135	138	126	126	216	219	337	337	267	267	129	129	244	244
S108	Self-pollination	336	350	269	269	173	173	277	277	250	254	258	258	335	335	255	255	131	131	345	345	237	237	115	115	276	276	135	138	126	126	216	219	337	343	267	267	129	129	208	244
S109	Self-pollination	336	350	269	277	173	173	277	277	254	254	258	258	335	335	255	255	131	131	337	337	237	237	109	115	276	276	135	138	126	126	216	219	343	343	267	267	120	129	208	208
S110	Self-pollination	350	350	269	277	173	173	277	277	250	254	270	270	335	335	255	255	131	131	337	345	237	237	109	115	276	276	135	138	126	126	219	219	343	343	267	267	120	129	208	208
S111	Self-pollination	350	350	269	277	173	173	277	277	250	254	258	258	335	335	255	255	131	131	337	345	237	237	115	115	276	276	135	135	126	126	216	219	343	343	267	267	120	129	208	244
S112	Self-pollination	350	350	277	277	173	173	277	277	250	254	258	270	335	335	255	255	131	131	337	345	237	237	115	115	276	276	138	138	126	126	216	219	343	343	267	267	120	129	208	208
S113	Self-pollination	336	350	269	277	173	173	277	277	250	250	270	270	335	335	255	255	131	131	337	337	237	237	109	115	276	276	135	138	126	126	216	219	337	343	267	267	120	129	208	244
S114	Self-pollination	336	350	277	277	173	173	277	277	250	250	270	270	335	335	255	255	131	131	337	345	237	237	109	109	276	276	135	138	126	126	216	219	343	343	267	267	120	129	208	208
S115	Self-pollination	336	336	277	277	173	173	277	277	250	250	258	270	335	335	255	255	131	131	337	345	237	237	109	115	276	276	135	138	126	126	216	216	337	337	267	267	120	129	208	244
S116	Self-pollination	336	350	269	277	173	173	277	277	254	254	258	270	335	335	255	255	131	131	337	345	237	237	109	109	276	276	135	135	126	126	216	216	337	343	267	267	-9	-9	208	244
S117	Self-pollination	336	350	269	269	173	173	277	277	250	254	258	270	335	335	255	255	131	131	337	345	237	237	109	115	276	276	138	138	126	126	216	219	343	343	267	267	129	129	208	208
S118	Self-pollination	336	350	269	277	173	173	277	277	250	254	258	270	335	335	255	255	131	131	337	345	237	237	109	109	276	276	135	138	126	126	216	219	337	337	267	267	129	129	208	244
S119	Self-pollination	336	350	269	277	173	173	277	277	250	254	258	270	335	335	255	255	131	131	337	345	237	237	109	115	276	276	135	138	126	126	216	219	337	337	267	267	129	129	244	244
S120	Self-pollination	350	350	269	269	173	173	277	277	254	254	270	270	335	335	255	255	131	131	337	337	237	237	109	109	276	276	135	138	126	126	216	219	337	343	267	267	129	129	208	244
S121	Self-pollination	336	336	269	277	173	173	277	277	254	254	270	270	335	335	255	255	131	131	337	345	237	237	109	115	276	276	135	135	126	126	216	219	343	343	267	267	120	129	208	244
S122	Self-pollination	336	350	269	277	173	173	277	277	250	250	258	270	335	335	255	255	131	131	337	337	237	237	109	115	276	276	135	138	126	126	216	219	337	343	267	267	120	129	208	244
S123	Self-pollination	336	350	277	277	173	173	277	277	254	254	258	258	335	335	255	255	131	131	337	345	237	237	115	115	276	276	135	138	126	126	216	219	337	337	267	267	120	129	244	244
S124	Self-pollination	350	350	269	277	173	173	277	277	250	254	258	270	335	335	255	255	131	131	337	345	237	237	109	115	276	276	135	135	126	126	219	219	337	343	267	267	120	129	208	244
S125	Self-pollination	336	350	269	269	173	173	277	277	250	254	258	270	335	335	255	255	131	131	337	345	237	237	109	115	276	276	135	138	126	126	216	219	337	343	267	267	129	129	208	244
S126	Self-pollination	336	336	269	277	173	173	277	277	250	254	258	270	335	335	255	255	131	131	337	345	237	237	109	115	276	276	138	138	126	126	216	219	337	343	267	267	120	129	208	244
S127	Self-pollination	336	350	277	277	173	173	277	277	250	254	258	270	335	335	255	255	131	131	337	337	237	237	115	115	276	276	135	135	126	126	216	216	343	343	267	267	120	129	208	208
S128	Self-pollination	336	350	269	269	173	173	277	277	250	254	270	270	335	335	255	255	131	131	337	337	237	237	115	115	276	276	135	138	126	126	216	219	337	343	267	267	120	129	208	244
S129	Self-pollination	336	350	269	269	173	173	277	277	250	254	258	270	335	335	255	255	131	131	337	345	237	237	109	115	276	276	138	138	126	126	219	219	343	343	267	267	120	129	208	208
S130	Self-pollination	336	336	269	269	173	173	277	277	250	254	270	270	335	335	255	255	131	131	337	345	237	237	109	109	276	276	138	138	126	126	216	219	343	343	267	267	129	129	208	208
S131	Self-pollination	350	350	277	277	173	173	277	277	254	254	258	270	335	335	255	255	131	131	337	345	237	237	115	115	276	276	135	135	126	126	216	219	343	343	267	267	120	129	208	208
S132	Self-pollination	336	350	269	269	173	173	277	277	254	254	258	270	335	335	255	255	131	131	345	345	237	237	115	115	276	276	135	135	126	126	219	219	337	343	267	267	120	129	208	244
S133	Self-pollination	336	350	269	277	173	173	277	277	250	250	258	270	335	335	255	255	131	131	337	345	237	237	109	115	276	276	138	138	126	126	216	219	343	343	267	267	129	129	208	208
S134	Self-pollination	336	350	277	277	173	173	277	277	250	250	270	270	335	335	255	255	131	131	345	345	237	237	109	115	276	276	135	138	126	126	216	216	337	343	267	267	120	129	208	244
S135	Self-pollination	336	350	269	269	173	173	277	277	250	254	258	258	335	335	255	255	131	131	345	345	237	237	109	115	276	276	135	135	126	126	216	219	337	337	267	267	120	129	244	244
S136	Self-pollination	336	350	269	277	173	173	277	277	250	254	258	270	335	335	249	249	131	131	337	345	237	237	109	115	276	276	138	138	126	126	219	219	337	343	267	267	120	129	208	244
S137	Self-pollination	336	350	269	269	173	173	277	277	254	254	258	270	335	335	255	255	131	131	337	345	237	237	109	109	276	276	135	138	126	126	216	219	343	343	267	267	120	129	208	244
S138	Self-pollination	336	350	277	277	173	173	277	277	250	254	258	270	335	335	255	255	131	131	337	345	237	237	115	115	276	276	135	135	126	126	216	219	337	343	267	267	120	129	208	244
S139	Self-pollination	336	350	269	269	173	173	277	277	250	254	270	270	335	335	255	255	131	131	337	345	237	237	109	109	276	276	135	135	126	126	216	216	337	343	267	267	129	129	208	244
S140	Self-pollination	336	350	269	277	173	173	277	277	254	254	258	258	335	335	255	255	131	131	337	345	237	237	109	109	276	276	135	138	126	126	219	219	337	343	267	267	129	129	208	244
S141	Self-pollination	336	350	277	277	173	173	277	277	254	254	258	270	335	335	255	255	131	131	337	345	237	237	115	115	276	276	135	138	126	126	216	219	343	343	267	267	120	129	208	208
S142	Self-pollination	336	336	269	277	173	173	277	277	250	254	258	258	335	335	255	255	131	131	337	345	237	237	109	115	276	276	135	138	126	126	216	216	337	337	267	267	120	129	244	244
S144	Self-pollination	336	350	269	277	173	173	277	277	250	254	258	270	335	335	255	255	131	131	337	345	237	237	115	115	276	276	135	138	126	126	216	219	337	343	267	267	120	129	208	244
S145	Self-pollination	336	350	269	277	173	173	277	277	250	254	258	270	335	335	255	255	131	131	337	345	237	237	109	115	276	276	135	135	126	126	216	219	337	343	267	267	120	129	208	244
S146	Self-pollination	350	350	277	277	173	173	277	277	254	254	258	258	335	335	255	255	131	131	337	345	237	237	115	115	276	276	135	138	126	126	216	219	337	343	267	267	129	129	208	244
S147	Self-pollination	336	350	269	277	173	173	277	277	250	254	258	270	335	335	255	255	131	131	337	345	237	237	109	115	276	276	138	138	126	126	216	219	337	343	267	267	120	129	208	244
S148	Self-pollination	336	350	269	277	173	173	277	277	250	254	258	270	335	335	255	255	131	131	337	337	237	237	109	115	276	276	135	135	126	126	216	219	337	343	267	267	129	129	208	244
S149	Self-pollination	336	350	269	269	173	173	277	277	250	254	258	270	335	335	255	255	131	131	337	345	237	237	109	115	276	276	135	138	126	126	216	219	343	343	267	267	120	129	208	208
S150	Self-pollination	336	350	269	277	173	173	277	277	250	254	258	270	335	335	255	255	131	131	345	345	237	237	109	115	276	276	135	138	126	126	216	219	337	343	267	267	120	129	244	244
S151	Self-pollination	336	350	277	277	173	173	277	277	250	254	258	270	335	335	255	255	131	131	337	337	237	237	109	115	276	276	135	135	126	126	219	219	337	343	267	267	120	129	208	244
S152	Self-pollination	336	336	269	277	173	173	277	277	250	254	258	258	335	335	255	255	131	131	345	345	237	237	109	115	276	276	135	138	126	126	219	219	337	337	267	267	120	129	244	244
S153	Self-pollination	336	350	269	277	173	173	277	277	250	254	258	270	335	335	255	255	131	131	337	337	237	237	109	115	276	276	135	138	126	126	216	219	337	343	267	267	120	129	208	244
S154	Self-pollination	336	350	277	277	173	173	277	277	250	250	270	270	335	335	255	255	131	131	337	345	237	237	109	115	276	276	135	138	126	126	216	219	343	343	267	267	120	129	208	208
S155	Self-pollination	336	350	269	269	173	173	277	277	254	254	258	270	335	335	255	255	131	131	345	345	237	237	115	115	276	276	135	135	126	126	216	216	337	337	267	267	120	129	244	244
S156	Self-pollination	336	350	269	277	173	173	277	277	254	254	258	270	335	335	255	255	131	131	337	345	237	237	109	109	276	276	135	138	126	126	216	219	337	343	267	267	120	129	208	244
S157	Self-pollination	336	350	269	269	173	173	277	277	250	254	258	270	335	335	255	255	131	131	337	345	237	237	109	115	276	276	135	135	126	126	216	219	337	343	267	267	120	129	208	244
S158	Self-pollination	336	336	269	277	173	173	277	277	250	254	258	270	335	335	255	255	131	131	345	345	237	237	109	109	276	276	135	138	126	126	216	216	343	343	267	267	120	129	208	244
S160	Self-pollination	336	336	277	277	173	173	277	277	250	250	270	270	335	335	255	255	131	131	345	345	237	237	115	115	276	276	135	135	126	126	216	219	337	343	267	267	120	129	208	244
S161	Self-pollination	336	350	269	269	173	173	277	277	250	254	270	270	335	335	255	255	131	131	337	337	237	237	109	115	276	276	135	138	126	126	219	219	337	343	267	267	120	129	208	244
S163	Self-pollination	336	336	269	277	173	173	277	277	250	254	258	270	335	335	255	255	131	131	337	337	237	237	109	115	276	276	135	138	126	126	219	219	343	343	267	267	120	129	208	208
S164	Self-pollination	336	336	269	277	173	173	277	277	250	250	258	270	335	335	255	255	131	131	337	337	237	237	109	109	276	276	135	138	126	126	216	219	337	343	267	267	120	129	208	244
S165	Self-pollination	336	350	269	269	173	173	277	277	254	254	270	270	335	335	255	255	131	131	345	345	237	237	109	109	276	276	138	138	126	126	216	219	337	343	267	267	129	129	208	244
S166	Self-pollination	336	336	269	269	173	173	277	277	254	254	258	270	335	335	255	255	131	131	337	345	237	237	109	115	276	276	135	138	126	126	216	216	337	343	267	267	120	129	208	208
S167	Self-pollination	336	350	269	277	173	173	277	277	254	254	270	270	335	335	255	255	131	131	337	337	237	237	109	115	276	276	135	138	126	126	216	219	337	337	267	267	120	129	244	244
S168	Self-pollination	336	336	269	277	173	173	277	277	254	254	258	270	335	335	255	255	131	131	337	337	237	237	109	109	276	276	135	138	126	126	216	216	343	343	267	267	120	129	208	244
S170	Self-pollination	350	350	269	269	173	173	277	277	250	254	258	270	335	335	255	255	131	131	337	345	237	237	115	115	276	276	135	138	126	126	219	219	337	337	267	267	120	129	244	244
S171	Self-pollination	336	350	269	277	173	173	277	277	250	254	270	270	335	335	255	255	131	131	337	337	237	237	109	115	276	276	135	135	126	126	216	219	337	343	267	267	129	129	208	244
S172	Self-pollination	336	350	269	269	173	173	277	277	250	254	258	270	335	335	255	255	131	131	337	337	237	237	109	109	276	276	135	138	126	126	216	219	343	343	267	267	120	129	208	244
S173	Self-pollination	336	350	277	277	173	173	277	277	250	250	258	270	335	335	255	255	131	131	345	345	237	237	109	115	276	276	135	138	126	126	219	219	343	343	267	267	120	129	208	208
S174	Self-pollination	336	350	269	277	173	173	277	277	254	254	258	270	335	335	255	255	131	131	337	345	237	237	109	109	276	276	135	138	126	126	216	219	343	343	267	267	120	129	208	244
S175	Self-pollination	336	350	277	277	173	173	277	277	254	254	258	258	335	335	255	255	131	131	337	345	237	237	109	115	276	276	135	138	126	126	219	219	337	343	267	267	120	129	208	208
S176	Self-pollination	336	336	269	269	173	173	277	277	254	254	258	258	335	335	255	255	131	131	337	345	237	237	109	109	276	276	135	138	126	126	219	219	337	337	267	267	120	129	208	244
S177	Self-pollination	336	336	269	277	173	173	277	277	254	254	258	270	335	335	255	255	131	131	337	345	237	237	109	115	276	276	135	138	126	126	216	219	343	343	267	267	129	129	208	208
S178	Self-pollination	336	336	277	277	173	173	277	277	250	254	258	270	335	335	255	255	131	131	337	337	237	237	109	115	276	276	138	138	126	126	216	219	337	337	267	267	120	129	244	244
S179	Self-pollination	336	336	277	277	173	173	277	277	254	254	270	270	335	335	255	255	131	131	337	345	237	237	115	115	276	276	135	135	126	126	219	219	337	337	267	267	120	129	244	244
S180	Self-pollination	336	350	269	277	173	173	277	277	250	250	270	270	335	335	249	249	131	131	337	345	237	237	109	109	276	276	135	138	126	126	216	216	343	343	267	267	120	129	208	244
S181	Self-pollination	336	350	269	277	173	173	277	277	254	254	258	270	335	335	255	255	131	131	337	337	237	237	109	115	276	276	135	138	126	126	216	219	343	343	267	267	120	129	244	244
S182	Self-pollination	336	350	269	277	173	173	277	277	254	254	270	270	335	335	255	255	131	131	345	345	237	237	115	115	276	276	135	138	126	126	219	219	337	337	267	267	120	129	208	244
S184	Self-pollination	336	336	269	269	173	173	277	277	250	254	258	258	335	335	255	255	131	131	337	337	237	237	109	115	276	276	135	138	126	126	219	219	337	343	267	267	129	129	208	208
S185	Self-pollination	350	350	269	277	173	173	277	277	254	254	258	258	335	335	255	255	131	131	337	345	237	237	109	115	276	276	135	138	126	126	216	216	343	343	267	267	120	129	208	208
S187	Self-pollination	336	350	269	277	173	173	277	277	250	254	258	258	335	335	255	255	131	131	337	345	237	237	115	115	276	276	135	138	126	126	216	219	343	343	267	267	120	129	208	208
S188	Self-pollination	336	336	269	277	173	173	277	277	250	250	270	270	335	335	249	249	131	131	337	337	237	237	115	115	276	276	135	135	126	126	216	219	337	343	267	267	120	129	208	244
S189	Self-pollination	350	350	269	269	173	173	277	277	250	254	258	258	335	335	255	255	131	131	337	345	237	237	109	109	276	276	135	135	126	126	216	219	343	343	267	267	129	129	208	244
S190	Self-pollination	336	350	269	277	173	173	277	277	250	250	270	270	335	335	255	255	131	131	337	345	237	237	109	109	276	276	135	138	126	126	216	216	337	343	267	267	120	129	208	208
S191	Self-pollination	336	350	269	277	173	173	277	277	250	254	258	270	335	335	255	255	131	131	345	345	237	237	109	115	276	276	138	138	126	126	216	216	343	343	267	267	129	129	208	244
S192	Self-pollination	350	350	269	269	173	173	277	277	254	254	270	270	335	335	255	255	131	131	337	345	237	237	109	115	276	276	135	138	126	126	216	219	337	343	267	267	129	129	208	244
S193	Self-pollination	336	350	269	269	173	173	277	277	250	254	258	258	335	335	255	255	131	131	337	337	237	237	109	115	276	276	135	138	126	126	216	219	337	343	267	267	129	129	208	244
S194	Self-pollination	336	336	269	277	173	173	277	277	254	254	258	270	335	335	255	255	131	131	337	337	237	237	109	115	276	276	135	138	126	126	216	219	337	343	267	267	120	129	208	244
S195	Self-pollination	336	336	269	269	173	173	277	277	250	250	270	270	335	335	255	255	131	131	345	345	237	237	109	109	276	276	135	138	126	126	216	216	337	343	267	267	120	129	208	244
S196	Self-pollination	336	350	269	277	173	173	277	277	250	250	258	270	335	335	255	255	131	131	337	337	237	237	109	115	276	276	135	135	126	126	216	216	337	343	267	267	120	129	244	244
S197	Self-pollination	336	336	277	277	173	173	277	277	250	250	258	270	335	335	255	255	131	131	337	337	237	237	109	115	276	276	138	138	126	126	216	219	337	337	267	267	120	129	244	244
S198	Self-pollination	336	350	277	277	173	173	277	277	250	250	258	270	335	335	255	255	131	131	337	337	237	237	109	115	276	276	135	135	126	126	216	216	337	343	267	267	120	129	244	244
S199	Self-pollination	336	350	269	277	173	173	277	277	250	254	258	258	335	335	255	255	131	131	337	345	237	237	109	115	276	276	135	135	126	126	216	216	337	343	267	267	129	129	208	244
S200	Self-pollination	336	336	269	277	173	173	277	277	254	254	258	270	335	335	255	255	131	131	337	345	237	237	109	109	276	276	135	138	126	126	219	219	337	343	267	267	120	129	208	244
S201	Self-pollination	336	350	269	277	173	173	277	277	254	254	258	270	335	335	255	255	131	131	337	337	237	237	109	115	276	276	135	138	126	126	216	219	337	343	267	267	120	129	208	208
S203	Self-pollination	336	350	277	277	173	173	277	277	254	254	270	270	335	335	255	255	131	131	337	337	237	237	109	109	276	276	138	138	126	126	219	219	337	337	267	267	129	129	244	244
S204	Self-pollination	350	350	277	277	173	173	277	277	250	254	270	270	335	335	255	255	131	131	337	345	237	237	115	115	276	276	135	138	126	126	219	219	337	343	267	267	120	129	244	244
S205	Self-pollination	336	350	269	277	173	173	277	277	250	250	258	270	335	335	255	255	131	131	337	345	237	237	109	115	276	276	135	138	126	126	216	219	337	343	267	267	129	129	208	244
S217	Self-pollination	336	350	269	277	173	173	277	277	250	254	258	270	335	335	255	255	131	131	337	345	237	237	109	115	276	276	135	138	126	126	216	219	343	343	267	267	120	129	208	244
S218	Self-pollination	336	350	269	277	173	173	277	277	254	254	258	258	335	335	255	255	131	131	337	345	237	237	115	115	276	276	135	138	126	126	216	219	337	343	267	267	120	129	208	244
S220	Self-pollination	336	350	269	269	173	173	277	277	250	250	270	270	335	335	255	255	131	131	337	345	237	237	115	115	276	276	138	138	126	126	216	216	337	337	267	267	129	129	208	244
S2221	Self-pollination	350	350	269	277	173	173	277	277	254	254	258	258	335	335	255	255	131	131	337	337	237	237	109	115	276	276	135	138	126	126	219	219	337	343	267	267	120	129	208	244
S231	Self-pollination	336	350	269	277	173	173	277	277	250	250	258	258	335	335	249	249	131	131	337	337	237	237	109	109	276	276	135	138	126	126	216	219	343	343	267	267	129	129	208	244
S256	Self-pollination	350	350	269	277	173	173	277	277	250	250	270	270	335	335	255	255	131	131	345	345	237	237	109	115	276	276	135	138	126	126	219	219	337	343	267	267	120	129	208	244
S257	Self-pollination	336	350	269	277	173	173	277	277	250	254	270	270	335	335	255	255	131	131	345	345	237	237	115	115	276	276	135	135	126	126	216	219	337	343	267	267	120	129	208	244
S273	Self-pollination	350	350	269	269	173	173	277	277	250	254	258	258	335	335	255	255	131	131	337	345	237	237	109	109	276	276	138	138	126	126	216	216	337	343	267	267	129	129	208	244
S305	Self-pollination	336	350	269	277	173	173	277	277	250	250	258	270	335	335	255	255	131	131	345	345	237	237	115	115	276	276	135	138	126	126	216	219	337	343	267	267	129	129	208	244
Note: -9 indicated missing data.
